# Supplementary material for: Analysis of Flavonoids in Dalbergia odorifera by Ultra-Performance Liquid Chromatography with Tandem Mass Spectrometry
Source: PubMed Central journal article supplement (PMC7024225; doi:10.3390/molecules25020389), 2020-01-17
Supplement: molecules-25-00389-s001.pdf [file molecules-25-00389-s001.pdf]

# Analysis of flavonoids in *Dalbergia odorifera* by ultra-performance liquid chromatography with tandem mass spectrometry

Xiangsheng Zhao<sup>1</sup>, Shihui Zhang<sup>1</sup>, Dan Liu<sup>3</sup>, Meihua Yang<sup>1,2</sup>, Jianhe Wei<sup>1,2\*</sup>

<sup>1</sup> Hainan Provincial Key Laboratory of Resources Conservation and Development of Southern Medicine, Hainan Branch of the Institute of Medicinal Plant Development, Chinese Academy of Medical Sciences & Peking Union Medical College, Haikou 570311, China;

<sup>2</sup> Institute of Medicinal Plant Development, Chinese Academy of Medical Sciences & Peking Union Medical College, Beijing 100193, China;

<sup>3</sup> School of Life Science and Engineering, Southwest University of Science and Technology, Mianyang, 621010, China;

\*Corresponding author

Jianhe Wei, Institute of Medicinal Plant Development, Chinese Academy of Medical Sciences & Peking Union Medical College, No. 151 Malianwa North Road, Haidian District, Beijing 100193 P. R. China; Tel.: +8610 57833358; Fax: +8610 57833359; E-mail: [wjianh@263.net](mailto:wjianh@263.net).

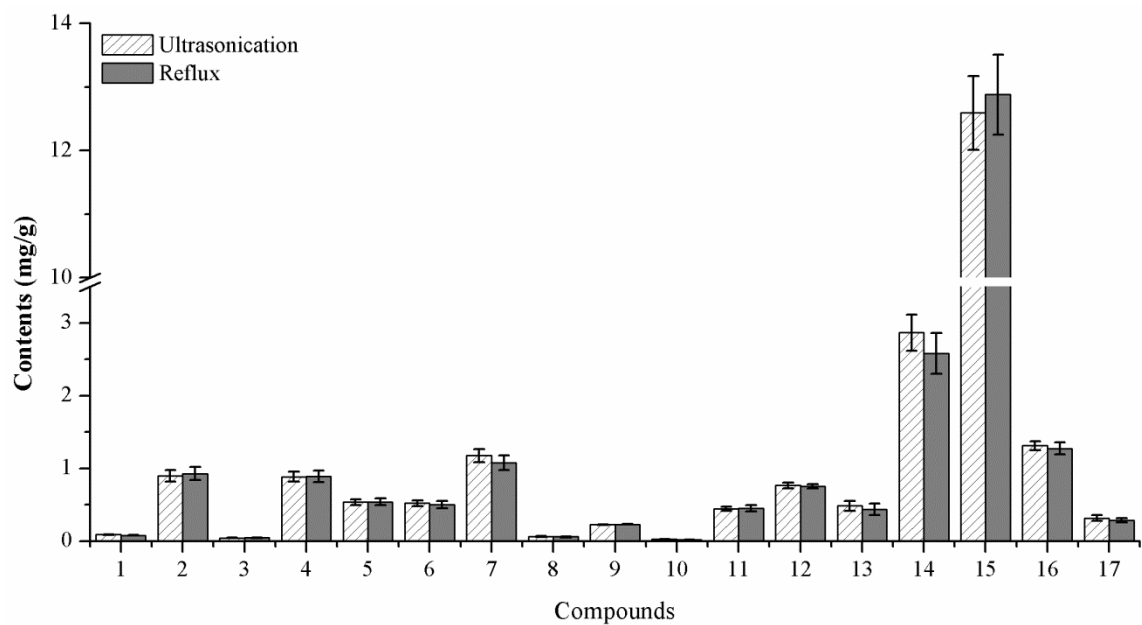

Figure S1. Effects of extraction method on the extraction efficiency of the target analytes in S9 samples.

**Table S1. Recoveries of 17 target compounds**

| NO. | Analytes             | Added ( $\mu\text{g}$ ) | Detected ( $\mu\text{g}$ ) | Recovery (%) | RSD (%) |
|-----|----------------------|-------------------------|----------------------------|--------------|---------|
| 1   | 3'-Hydroxydaidein    | 11.00                   | 10.66                      | 96.94        | 3.17    |
|     |                      | 9.00                    | 8.68                       | 96.46        | 2.69    |
|     |                      | 7.00                    | 6.84                       | 97.69        | 3.89    |
| 2   | Butein               | 110.00                  | 106.88                     | 97.16        | 2.68    |
|     |                      | 90.00                   | 88.32                      | 98.13        | 3.05    |
|     |                      | 75.00                   | 73.31                      | 97.74        | 3.73    |
| 3   | Daidzein             | 5.50                    | 5.23                       | 95.18        | 5.01    |
|     |                      | 4.50                    | 4.43                       | 98.37        | 4.43    |
|     |                      | 3.50                    | 3.42                       | 97.66        | 3.81    |
| 4   | Liquiritigenin       | 110.00                  | 109.21                     | 99.28        | 3.52    |
|     |                      | 90.00                   | 88.60                      | 98.44        | 2.88    |
|     |                      | 70.00                   | 68.75                      | 98.21        | 3.65    |
| 5   | Eriodictyol          | 65.00                   | 62.47                      | 96.11        | 3.15    |
|     |                      | 55.00                   | 52.54                      | 95.52        | 4.72    |
|     |                      | 45.00                   | 43.04                      | 95.65        | 3.80    |
| 6   | Butin                | 65.00                   | 63.08                      | 97.04        | 2.74    |
|     |                      | 50.00                   | 47.09                      | 94.18        | 3.98    |
|     |                      | 45.00                   | 43.37                      | 96.38        | 2.63    |
| 7   | Naringenin           | 140.00                  | 136.11                     | 97.22        | 3.19    |
|     |                      | 120.00                  | 114.44                     | 95.37        | 1.93    |
|     |                      | 95.00                   | 92.06                      | 96.91        | 2.47    |
| 8   | Genistein            | 8.50                    | 8.39                       | 98.65        | 1.86    |
|     |                      | 7.00                    | 6.87                       | 98.15        | 2.70    |
|     |                      | 5.50                    | 5.34                       | 97.10        | 1.99    |
| 9   | Tectorigenin         | 25.00                   | 23.90                      | 95.59        | 3.53    |
|     |                      | 20.00                   | 19.22                      | 96.09        | 4.12    |
|     |                      | 16.00                   | 15.61                      | 97.58        | 3.03    |
| 10  | Alpinetin            | 3.00                    | 2.83                       | 94.32        | 2.03    |
|     |                      | 2.50                    | 2.38                       | 95.32        | 3.34    |
|     |                      | 2.00                    | 1.89                       | 94.65        | 2.95    |
| 11  | Isoliquiritigenin    | 55.00                   | 54.91                      | 99.84        | 2.87    |
|     |                      | 45.00                   | 44.81                      | 99.57        | 4.61    |
|     |                      | 40.00                   | 39.41                      | 98.53        | 3.98    |
| 12  | Formononetin         | 95.00                   | 96.87                      | 101.97       | 3.61    |
|     |                      | 80.00                   | 79.06                      | 98.82        | 4.58    |
|     |                      | 60.00                   | 59.59                      | 99.31        | 3.86    |
| 13  | Dalbergin            | 60.00                   | 59.35                      | 98.91        | 3.66    |
|     |                      | 50.00                   | 49.63                      | 99.25        | 2.48    |
|     |                      | 40.00                   | 39.23                      | 98.07        | 3.20    |
| 14  | 3'-O-methylviolanone | 350.00                  | 344.23                     | 98.35        | 4.17    |
|     |                      | 300.00                  | 299.19                     | 99.73        | 3.49    |
|     |                      | 225.00                  | 217.73                     | 96.77        | 3.25    |

|    |             |         |         |       |      |
|----|-------------|---------|---------|-------|------|
| 15 | Sativanone  | 1500.00 | 1449.15 | 96.61 | 2.96 |
|    |             | 1250.00 | 1220.38 | 97.63 | 3.15 |
|    |             | 1000.00 | 954.80  | 95.48 | 1.88 |
| 16 | Pinocembrin | 160.00  | 153.98  | 96.24 | 4.75 |
|    |             | 140.00  | 133.80  | 95.57 | 4.23 |
|    |             | 110.00  | 108.10  | 98.27 | 5.22 |
| 17 | Prunetin    | 40.00   | 39.24   | 98.10 | 3.81 |
|    |             | 32.00   | 31.94   | 99.81 | 4.52 |
|    |             | 25.00   | 23.79   | 95.15 | 3.65 |

---
